# Supplementary material
Source: publisher site journal article supplement (https://www.degruyterbrill.com/publication/journal_key/TW/downloadAsset/TW_CfP_varia_english_2025.pdf)
Supplement: Supplementary file 1 [file TW_CfP_varia_english_2025.pdf]

## Call for Papers: Varia Submissions

### Zeitschrift für Tourismuswissenschaft - Journal of Tourism Science

The Zeitschrift für Tourismuswissenschaft - Journal of Tourism Science - cordially invites you to submit manuscripts for forthcoming Varia issues. The journal continues the tradition of in-depth scientific discourse on various aspects of tourism and is aimed at a broad audience of researchers and practitioners.

#### Focus and topics:

We are looking for contributions that deal with multidisciplinary and interdisciplinary topics related to tourism phenomena. We are particularly, but not exclusively, interested in contributions from the following fields

- History, geography
- Communication and media studies
- Cultural Studies, Ethnology, Cultural Anthropology
- Methodology/Statistics, Ecology
- Psychology, Sociology
- Economics, Business Administration
- Pedagogy

#### Submission process:

Please submit your manuscripts via our online submission system on the [journal's website](#). For more information, please visit our website and click on Call for Papers. If you have any questions, please do not hesitate to contact us directly.

***Your paper will be published under Golden Open Access and CC-BY 4.0 license.*** This allows you to reach a wider audience.

Please indicate which contribution category you would like to submit for. The following submissions are possible:

| Submission category | Guidelines                                                                                                                                                                                                                                                                                                                                                                                                                | Scope                                                                                                                        |
|---------------------|---------------------------------------------------------------------------------------------------------------------------------------------------------------------------------------------------------------------------------------------------------------------------------------------------------------------------------------------------------------------------------------------------------------------------|------------------------------------------------------------------------------------------------------------------------------|
| Full articles       | <p>A full article should be structured in a classical way. The article introduces to the relevant research question, it deals with the current state of research and contributes significantly to the development of theory in tourism sciences. Of course, well-founded theory-guided empirical research can also be presented.</p> <p>All submissions will be evaluated in a double-blind procedure by two experts.</p> | <p>20 pages at maximum (including tables, figures, abstract, footnotes and references)</p> <p>In total 56.000 characters</p> |

|                                          |                                                                                                                                                                                                                                                                                                                                                                                                                   |                                                              |
|------------------------------------------|-------------------------------------------------------------------------------------------------------------------------------------------------------------------------------------------------------------------------------------------------------------------------------------------------------------------------------------------------------------------------------------------------------------------|--------------------------------------------------------------|
| Impulses and contributions to discussion | <p>Short statements (preferably in English) that stimulate the discussion on central issues in tourism science. In addition, contributions to the discussion can be formulated in response to the impulses.</p> <p>The contributions will be reviewed by those responsible for the issue.</p>                                                                                                                     | 10,000 characters<br>(at maximum)                            |
| Research notes                           | <p>Presentation of current empirical projects or studies that are relevant for tourism research. Project reports should provide an overview of the empirical research. The structure should follow classical reports (theoretical introduction, state of the art, questions and hypotheses, study design, results, discussion).</p> <p>The contributions will be reviewed by those responsible for the issue.</p> | <p>10 pages at maximum</p> <p>In total 28,000 characters</p> |
| Book reviews                             | Reviews of new books in the field of German and international tourism studies are always welcome.                                                                                                                                                                                                                                                                                                                 | 10,000 characters<br>(at maximum)                            |
| Conference reports                       | Also short reports of tourism conferences can always be published in the Journal of Tourism Science.                                                                                                                                                                                                                                                                                                              | 10,000 characters<br>(at maximum)                            |

The article and research notes submitted for publication must be preceded by an abstract of maximum 200 words. The abstract should be written in the style of a brief summary rather than as a teaser. A maximum of six German and English keywords should also be included.

[More information and guidelines for submission](#)

We look forward to your valuable contributions to the promotion of scientific discourse in the field of tourism science.
